# Supplementary material for: TIM-3 Expression Is Downregulated on Human NK Cells in Response to Cancer Targets in Synergy with Activation
Source: Cancers (Basel). 2020 Aug 26;12(9):2417. doi: 10.3390/cancers12092417 (PMC7565804; doi:10.3390/cancers12092417)
Supplement: Supplementary file 1 [file cancers-12-02417-s001.pdf]

# TIM-3 Expression is Downregulated on Human NK Cells in Response to Cancer Targets in Synergy with Activation

Tram N. Dao, Sagar Utturkar, Nadia Atallah Lanman and Sandro Matosevic

Supplementary Materials:

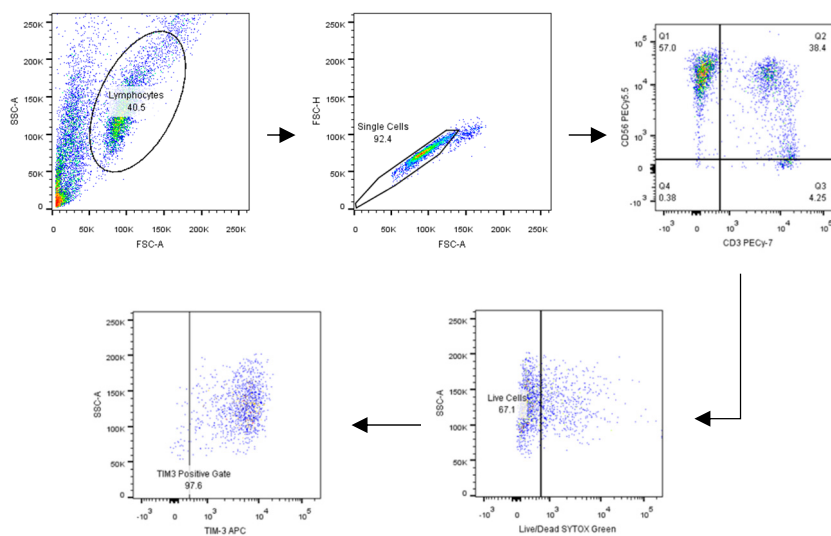

**Figure S1:** Gating strategy for stratification of TIM-3<sup>+</sup> NK cells by flow cytometry.

**Table S1.**  $\Delta$ MFI for NK cell inhibitory receptors upon co-culture with U87MG cells.

| Receptors | MFI <sub>control</sub> | MFI <sub>2.5</sub> | MFI <sub>10</sub> | $\Delta$ MFI <sub>2.5</sub> | $\Delta$ MFI <sub>10</sub> |
|-----------|------------------------|--------------------|-------------------|-----------------------------|----------------------------|
| PD-1      | 893.16667              | 899.3333           | 891               | 6.166667                    | -2.16667                   |
| NKG2A     | 17796.667              | 27916.83           | 19110.33          | 10120.17                    | 1313.667                   |
| TIM-3     | 4369.1111              | 1442.889           | 1748.889          | -2926.22                    | -2620.22                   |
| LAG-3     | 2470.5                 | 2545.167           | 2254              | 74.66667                    | -216.5                     |
| CD158b    | 112621.33              | 132151.8           | 123002            | 19530.5                     | 10380.67                   |
| CEACAM-1  | 1450.3333              | 1729.667           | 1749              | 279.3333                    | 298.6667                   |

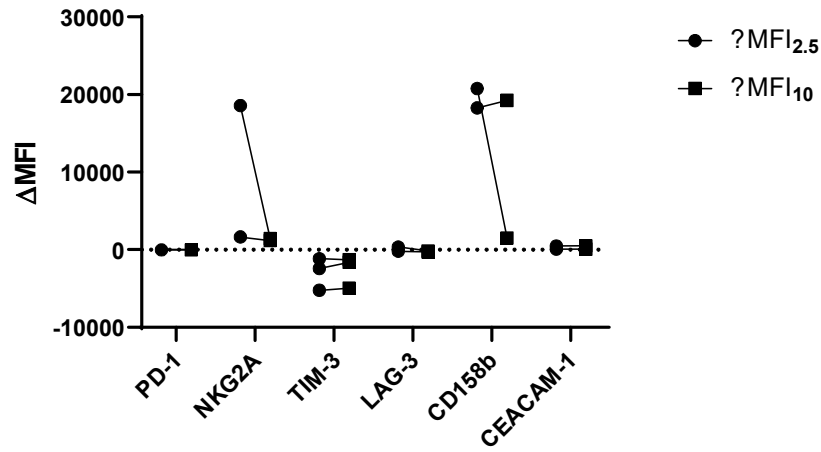

**Figure S2.** Visual representation of  $\Delta$ MFI for NK cell inhibitory receptors upon co-culture with U87MG cells.  $\Delta$ MFI was calculated by subtracting from the control MFI (NK only) (n = 6–9 independent samples).

(A)

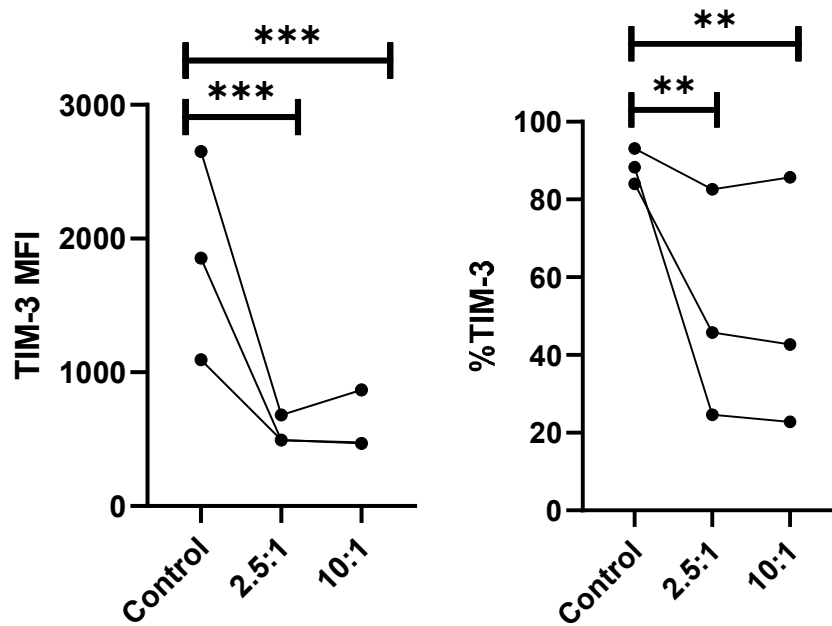

(B)

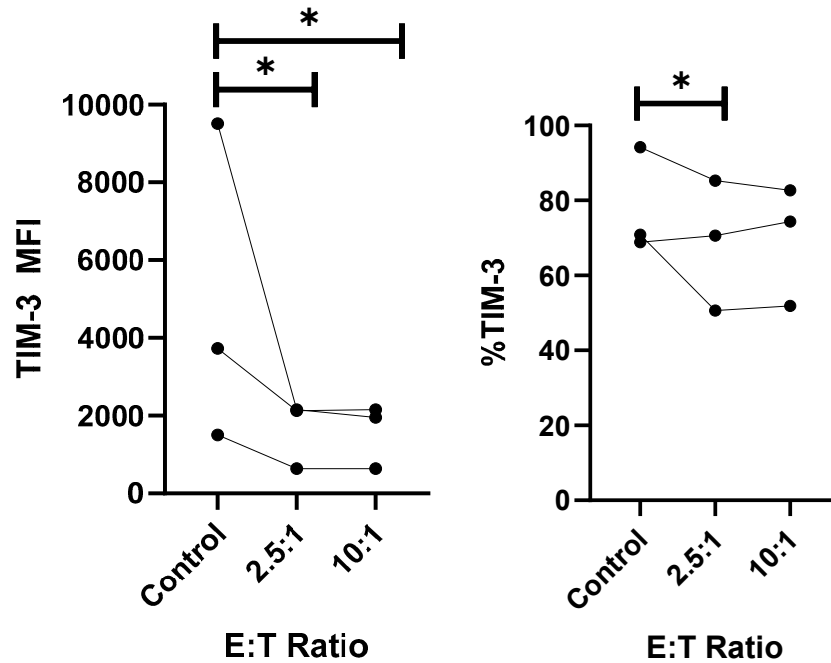

**Figure S3.** Individual donor trends in expression of TIM-3 on NK cells in response to cancer cells (mean  $\pm$  SEM). Percentage (left panels) and MFI (right panels) of TIM-3 on human peripheral blood NK cells in response to (A) Prostate cancer (PC3) ( $n = 3$  donors) and (B) primary human glioblastoma (GBM43) cells ( $n = 3$ ) after 4-hour co-culture at E:T ratios of 2.5:1 and 10:1. \* $p < 0.05$ , \*\* $p < 0.01$ , \*\*\* $p < 0.001$ .

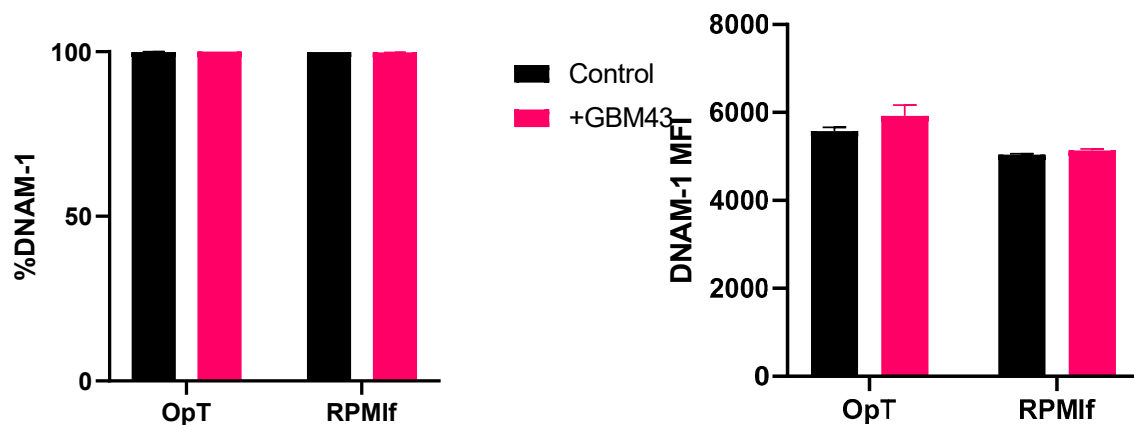

**Figure S4.** DNAM-1 expression on human NK cells in response to GBM cells. DNAM-1 percentage (left) and MFI (right) on NK cells upon co-culture with GBM43 cells at E:T 2.5:1 ( $n = 3$  independent samples). No change in DNAM-1 expression was observed. All stimulation conditions were consistent and as described in Materials and Methods.

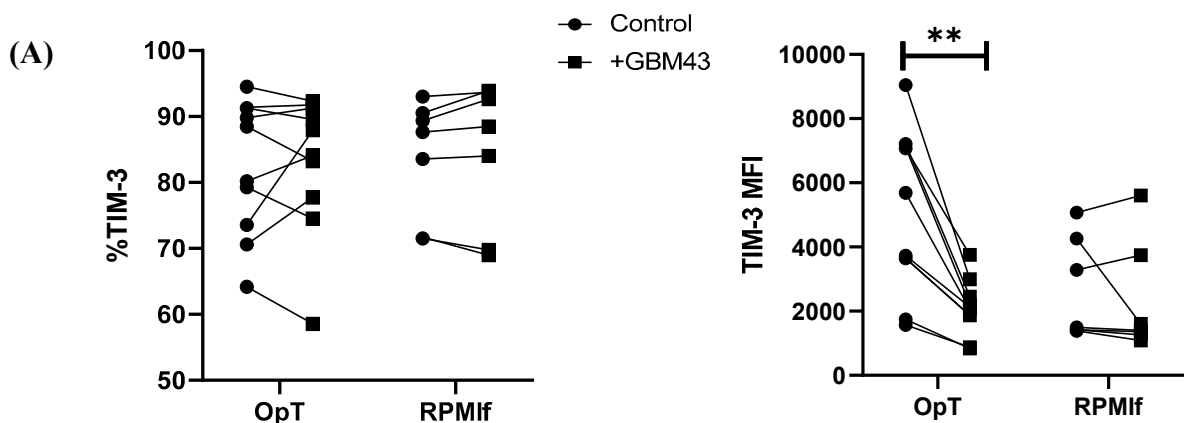

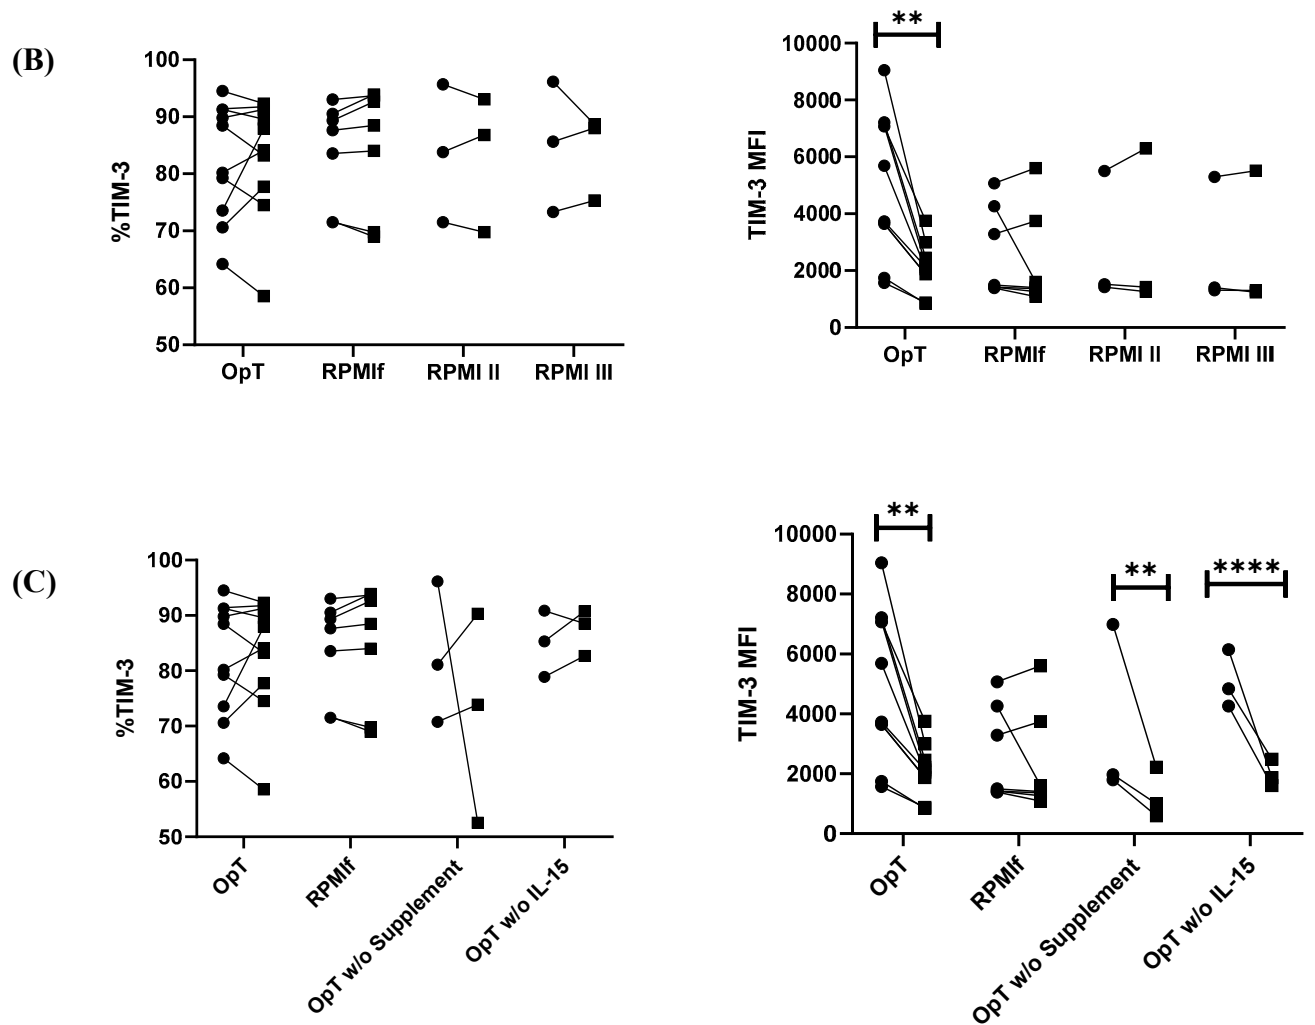

**Figure S5.** TIM-3 expression on human NK cells by individual donor. (A) Differences between OpTmizer™ (n = 10 donors) and RPMI media (n = 7); (B) Differences between RPMI media compositions (n = 3); (C) Differences between supplement compositions (n = 3). All stimulation conditions were consistent and as described in Materials and Methods.

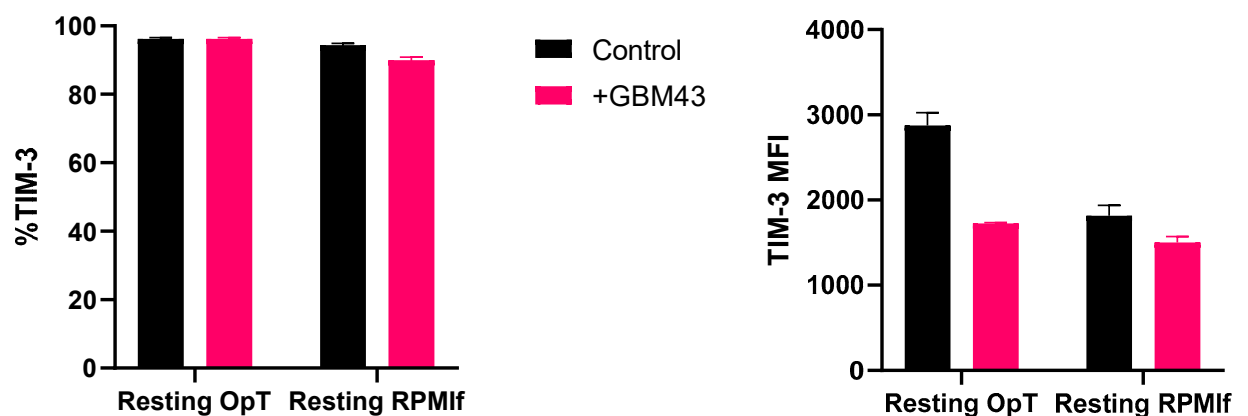

**Figure S6.** TIM-3 expression on resting human NK cells in response to GBM cells. TIM-3 percentage (left) and MFI (right) on resting NK cells upon co-culture with GBM43 cells at E:T 2.5:1 (n = 3 independent samples). NK cells were rested in culture media with no OpTmizer™ supplement or stimulation by cytokines for 24 hours prior to stimulation with GBM43 cells. All stimulation conditions were as described in Materials and Methods.

.

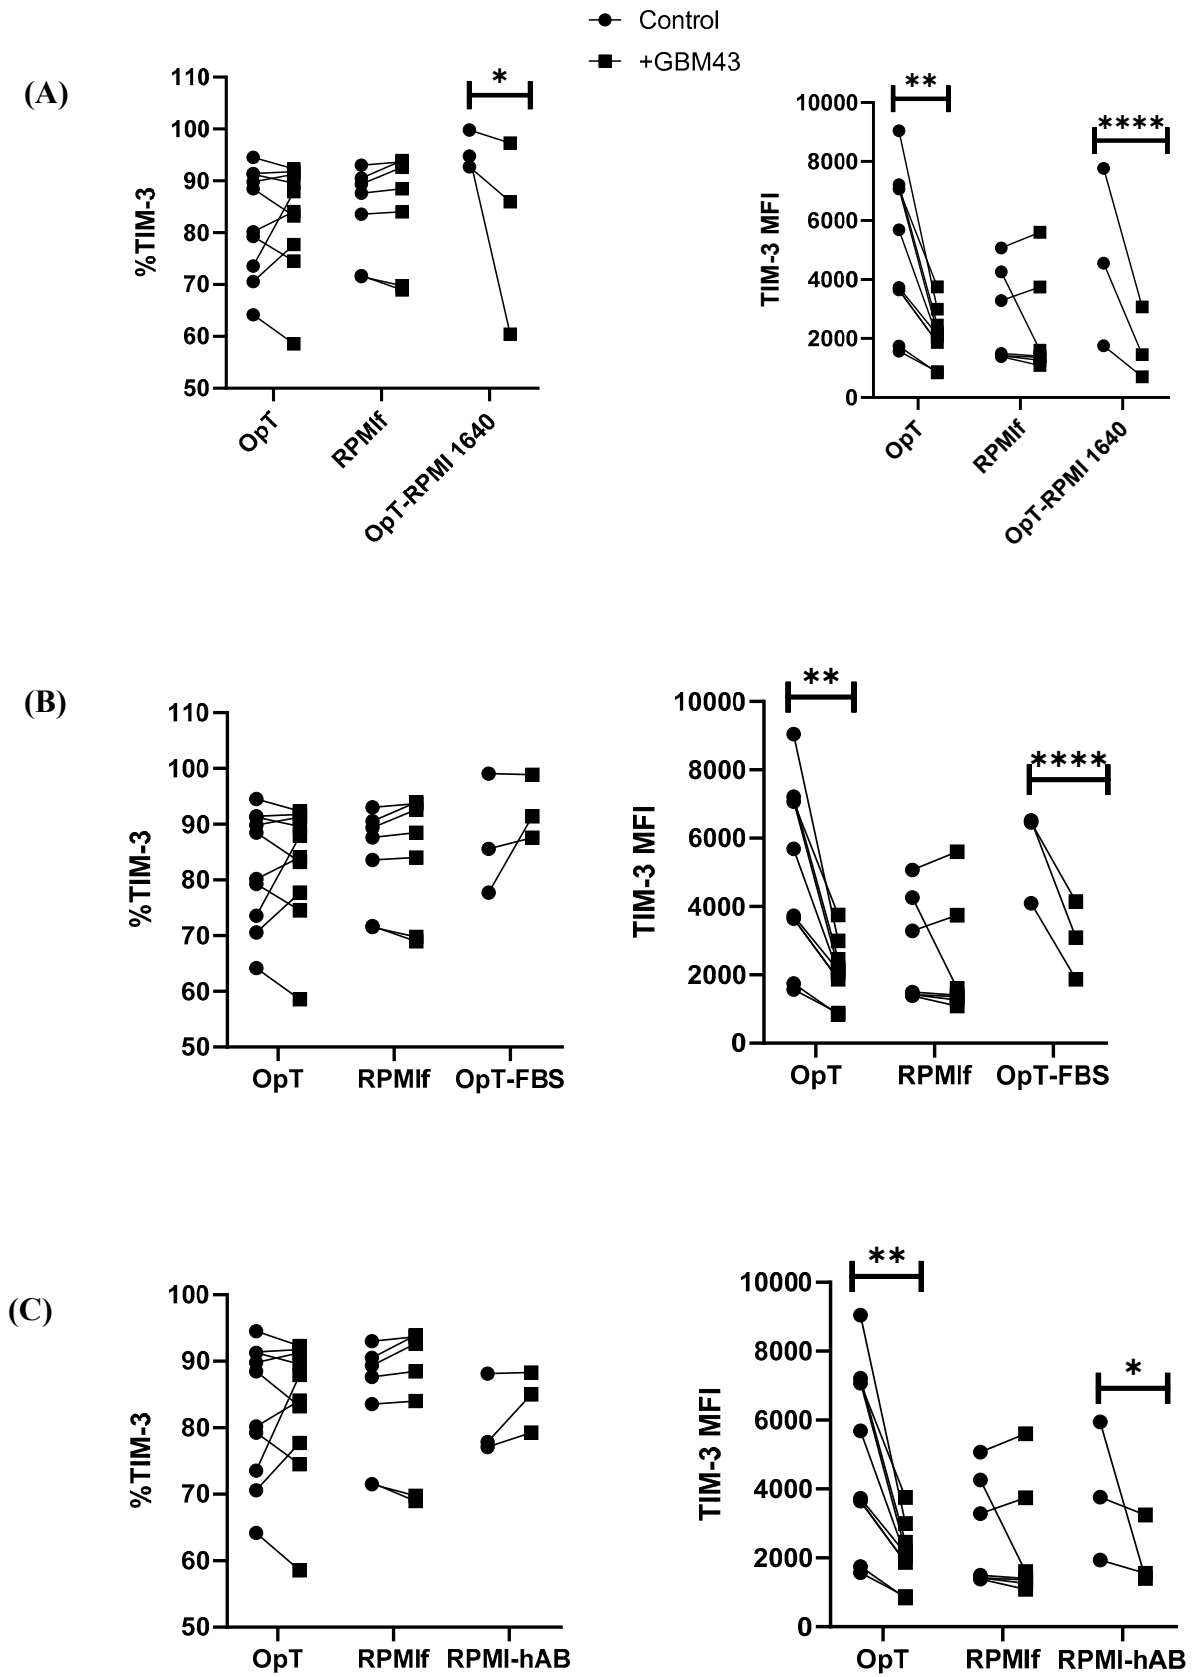

**Figure S7.** TIM-3 expression on NK cells by individual donor. (A) Differences against RPMI 1640 (n = 3 donors). (B) Differences against FBS (n = 3). (C) Differences against human AB serum (n = 3). All stimulation conditions were consistent and as described in *Materials and Methods*.

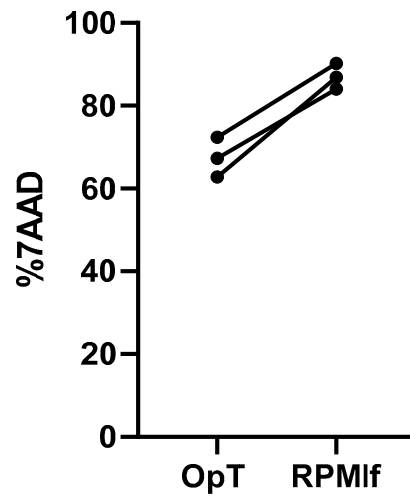

**Figure S8.** Cytotoxicity of NK cells against GBM43 cells in different media for individual donors. The killing assay was carried out over 4h incubation and detected via flow cytometric 7-ADD/CFSE staining as described in *Materials and Methods* (n = 3 donors).

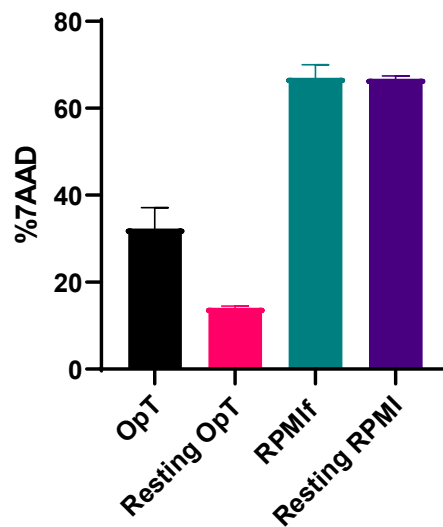

**Figure S9.** Effect of blockade of TIM-3 on the cytotoxicity of resting NK cells against GBM43 cells. The killing assay was carried out over 4h incubation and detected via flow cytometric 7-ADD/CFSE staining as described in *Materials and Methods*. NK cells were rested in medium with no supplementation or cytokines for 24 hours prior to being used in the killing assay (n = 3 independent samples).

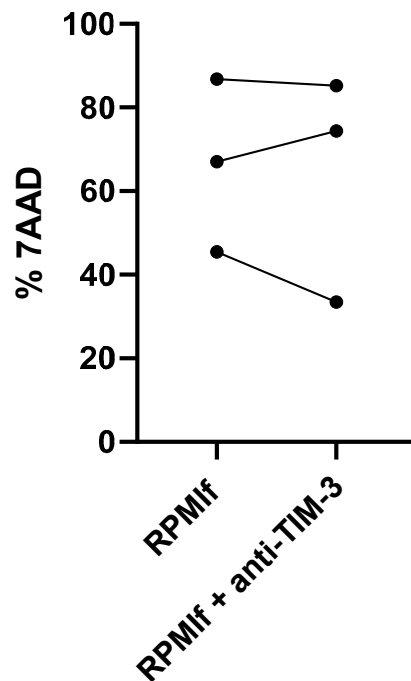

**Figure S10.** Effect of blockade of TIM-3 on the cytotoxicity of RPMIf-expanded NK cells against GBM43 cells for individual donors. The killing assay was carried out over 4h incubation and detected via flow cytometric 7-ADD/CFSE staining as described in *Materials and Methods* (n = 3 donors).

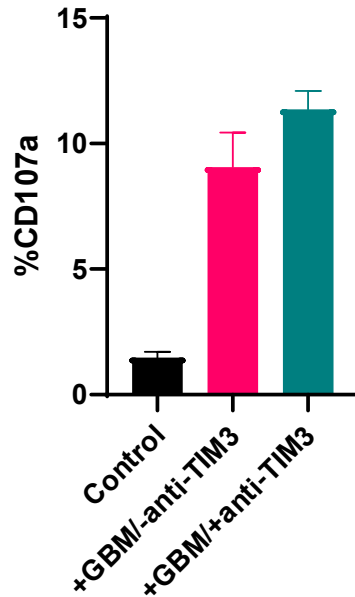

**Figure S11.** Effect of blockade of TIM-3 on the degranulation capacity of OpTmizer™-NK cells against GBM43 cells. The co-culture assay was carried out over 4h incubation and detected via flow cytometric staining of CD107a as described in *Materials and Methods* (n = 6 independent samples).

**Table S2.** Correlation of TIM-3 (*HAVCR2*) expression and NK cell presence in GBM based on bioinformatics analysis of TCGA patient data.

| Pathway             | pval      | padj      | ES        | NES      | Direction |
|---------------------|-----------|-----------|-----------|----------|-----------|
| NK_signature_custom | 0.0727273 | 0.0727273 | 0.7964387 | 1.478208 | Positive  |

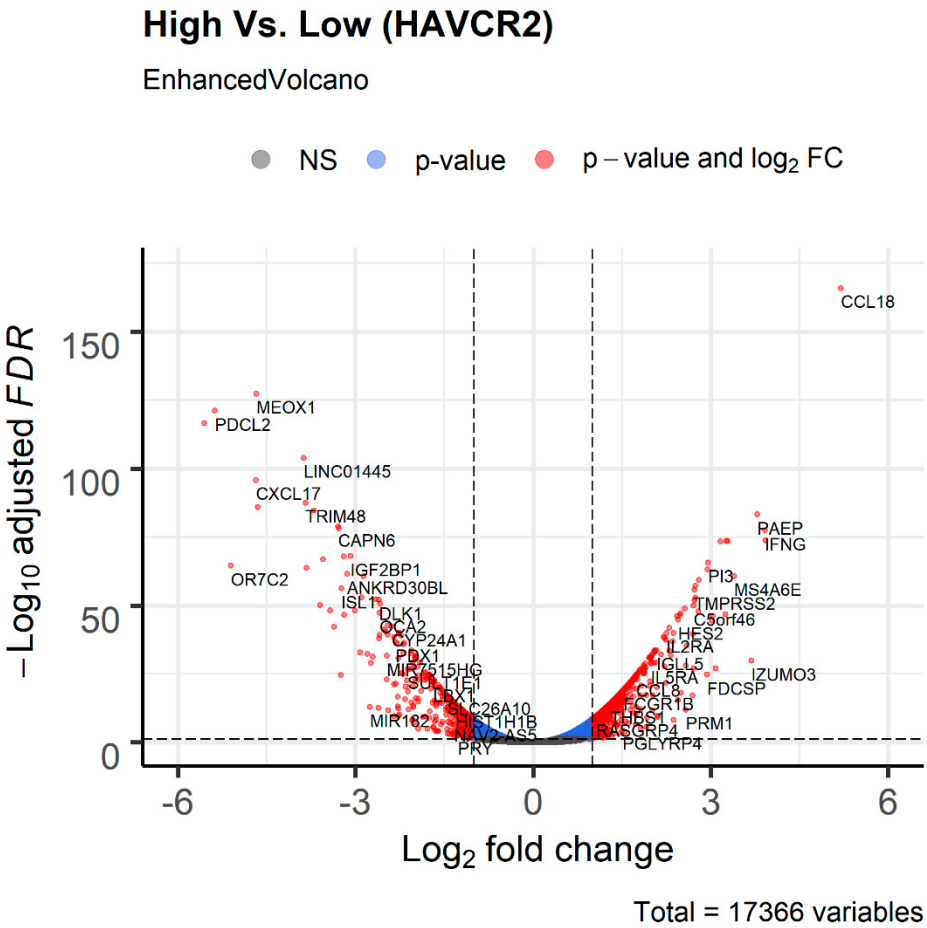

**Figure S12.** Volcano plot showing differentially expressed genes in *HAVCR2*<sup>+</sup> GBM patient datasets. Top up-regulated and down-regulated genes are shown following stratification of GBM patient data based on high vs. low *HAVCR2* expression (N = 176). Bioinformatics analysis is described in the Materials and Methods section.

(A)

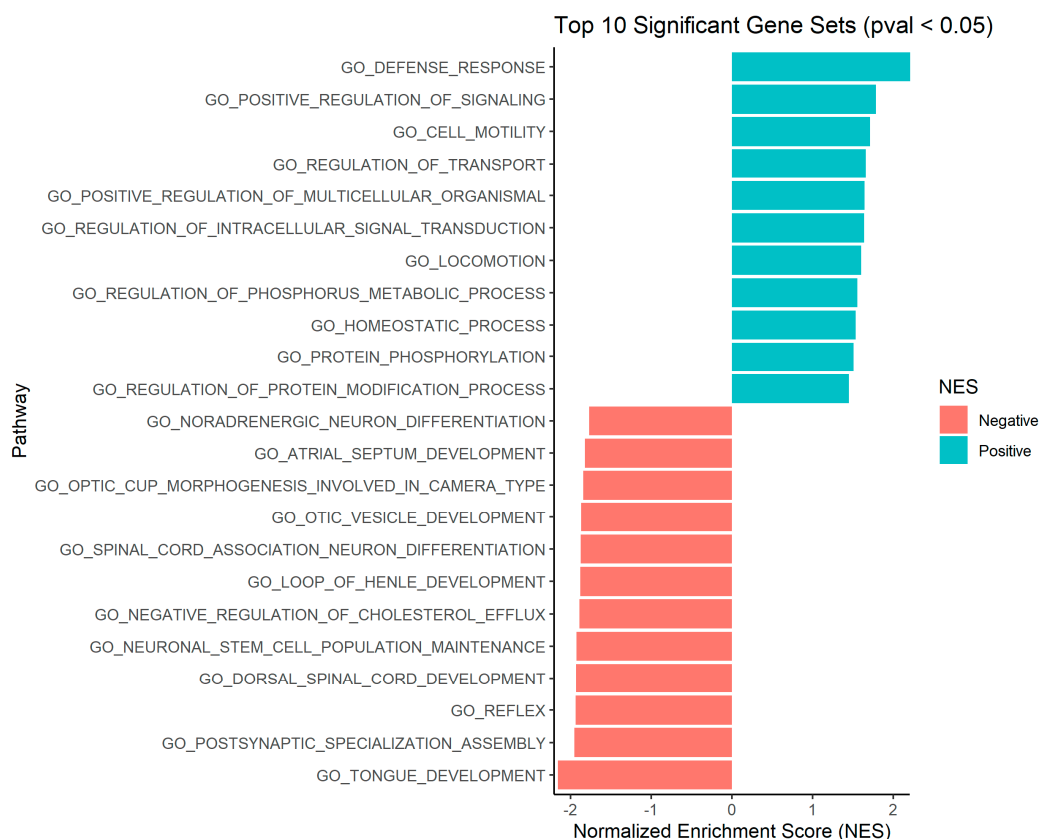

(B)

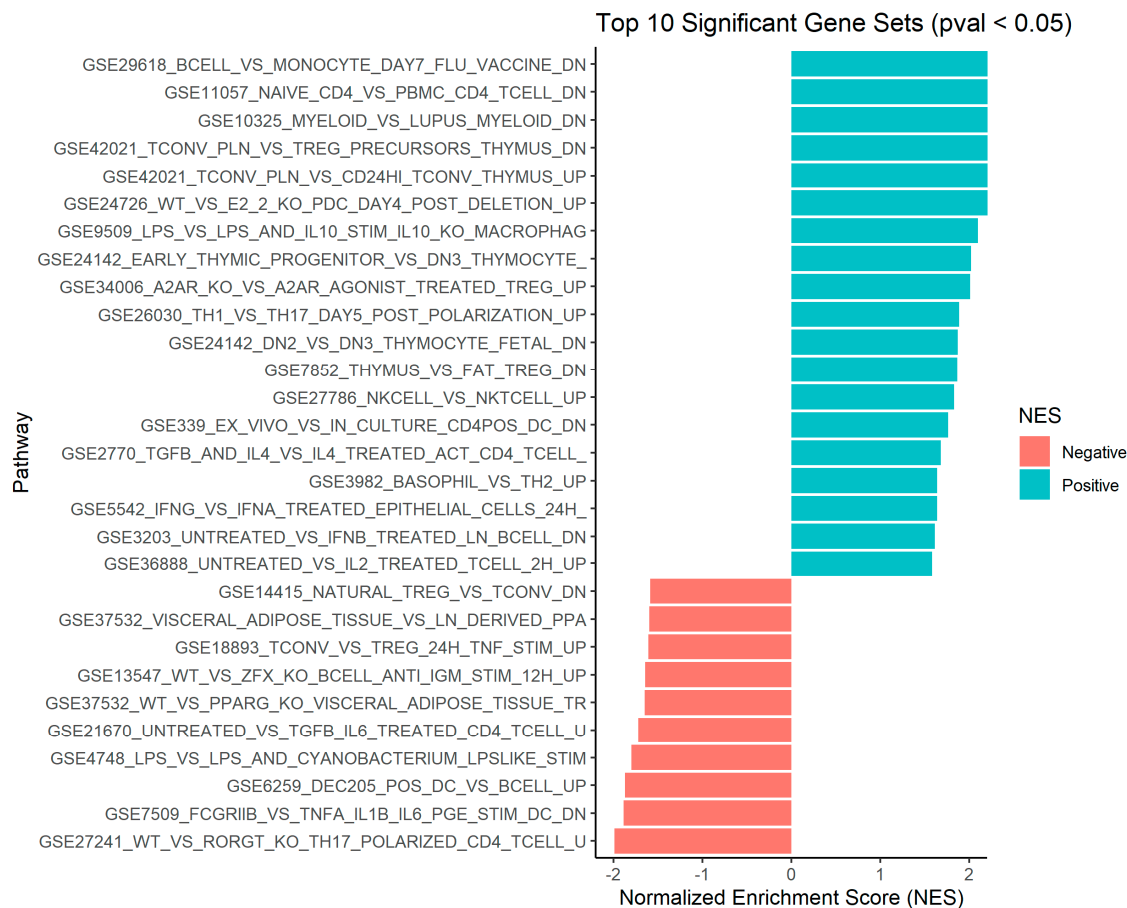

**Figure S13.** GSEA analysis of top up- and down-regulated genes in *HAVCR2*<sup>+</sup> GBM patient samples (TCGA). (A) GSEA analysis with GO-Biological Processes collection in MSigDB carried out on *HAVCR2*<sup>+</sup> GBM patient samples; (B) GSEA analysis with Immunologic collection in MSigDB carried out on *HAVCR2*<sup>+</sup> GBM patient samples.

(A)

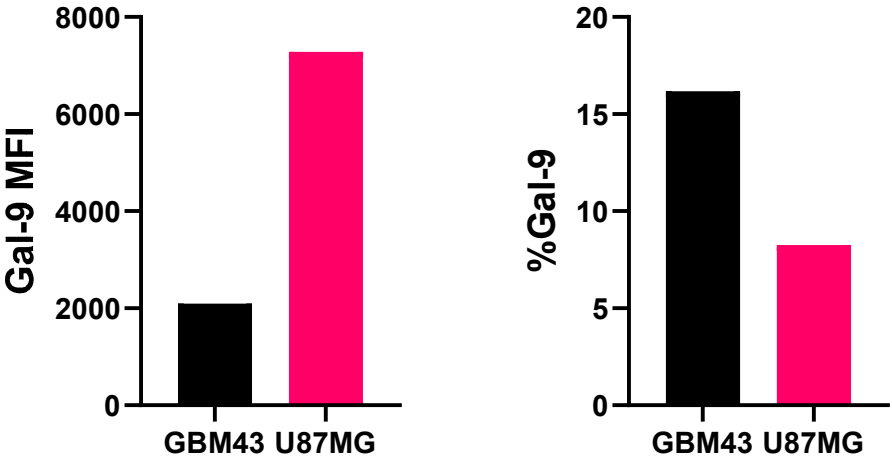

(B)

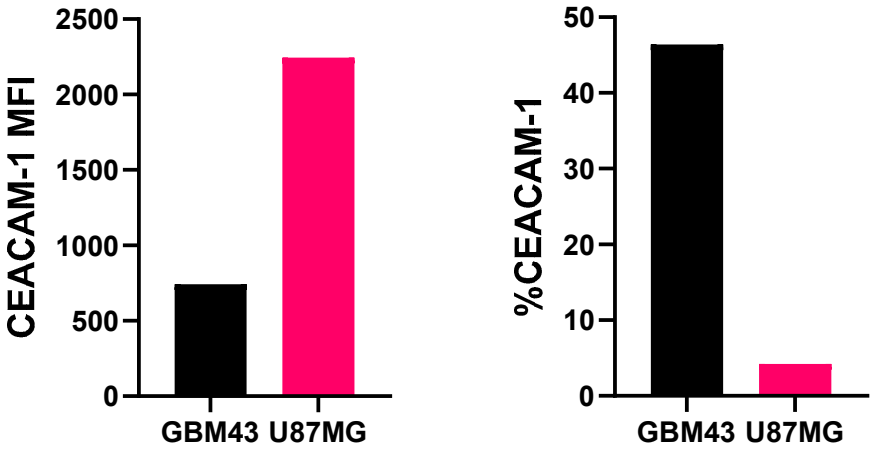

**Figure S14.** TIM-3 ligand expression on cancer cells. (A) Galectin-9 percentage (left panel) and MFI (right panel) on GBM34 and U87MG glioblastoma cells; (B) CEACAM-1 percentage (left panel) and MFI (right panel) on GBM34 and U87MG glioblastoma cells.

(A)

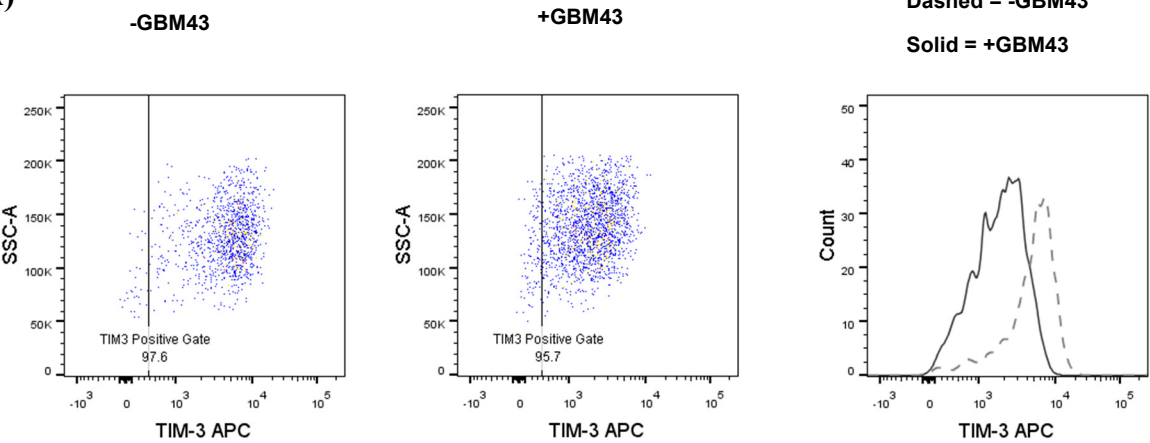

(B)

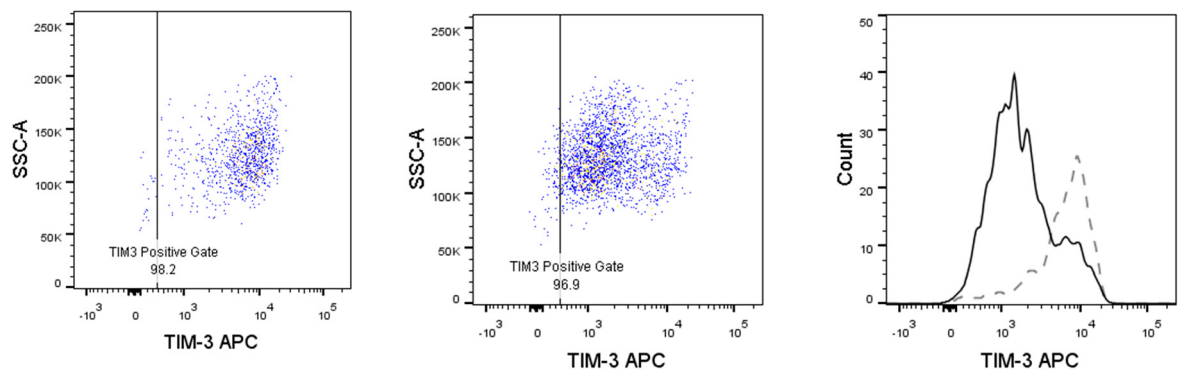

**Figure S15.** Flow cytometry dot plots for TIM-3 expression on human NK cells. Expression of TIM-3 on NK cells stimulated in (A) OpTmizer<sup>TM</sup> medium without (left panel) and in the presence (right panel) of GBM43 cell at E:T 2.5:1, and (B) RPMI medium without (left panel) and in the presence (right panel) of GBM43 cells at E:T 2.5:1. All stimulation conditions were as described in Materials and Methods.

**Table S3.** MESF values for MFI conditions recorded in the manuscript representing TIM-3 expression on NK cells. Values were converted to MESF units using APC-conjugated MESF beads using QuickCal<sup>®</sup> v2.3 software.

| Conditions        | MFI     | MESF    |
|-------------------|---------|---------|
| OpT, PNK + GBM43  | 831.667 | 40817.6 |
| OpT, PNK only     | 1173.67 | 65951.6 |
| RPMI, PNK + GBM43 | 1134.67 | 61220.2 |
| RPMI, PNK only    | 1128.67 | 60796.2 |

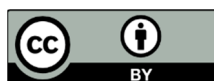

© 2020 by the authors. Licensee MDPI, Basel, Switzerland. This article is an open access article distributed under the terms and conditions of the Creative Commons Attribution (CC BY) license (<http://creativecommons.org/licenses/by/4.0/>).
